# Supplementary material
Source: PubMed Central journal article supplement (PMC5435232)
Supplement: NIHMS855899-supplement-supplement_1.pdf [file NIHMS855899-supplement-supplement_1.pdf]

Supplemental Table 1. Linear Regression Coefficients (95% CI) for Associations of Log 2-transformed Prenatal PFASs Concentrations with IQ Scores in Children at Each Time Point <sup>a</sup>

| Prenatal PFASs (ng/mL) | Age 5 years      |                    |                  | Age 8 years        |                  |                  |
|------------------------|------------------|--------------------|------------------|--------------------|------------------|------------------|
|                        | VIQ              | PIQ                | FSIQ             | VIQ                | PIQ              | FSIQ             |
| PFHxS                  | 0.5 (-1.0, 2.0)  | 0.5 (-1.0, 2.1)    | 0.4 (-1.1, 1.9)  | 0.0 (-1.5, 1.5)    | -0.2 (-1.8, 1.4) | -0.2 (-1.8, 1.4) |
| PFOA                   | 0.9 (-1.4, 3.3)  | 1.0 (-1.4, 3.4)    | 1.2 (-1.0, 3.5)  | 0.5 (-1.5, 2.5)    | -1.1 (-3.2, 1.0) | -0.4 (-2.5, 1.7) |
| PFOS                   | -1.7 (-4.0, 0.7) | -2.2 (-4.7, 0.3)   | -1.9 (-4.3, 0.5) | -1.3 (-3.6, 1.1)   | -1.6 (-4.0, 0.7) | -1.9 (-4.3, 0.4) |
| PFNA                   | 0.7 (-1.3, 2.7)  | -1.4 (-3.4, 0.6)   | -0.2 (-2.1, 1.7) | -2.1 (-3.9, -0.2)* | -1.5 (-3.5, 0.4) | -1.5 (-3.4, 0.4) |
| PFDeA                  | 0.8 (-2.0, 3.6)  | -1.3 (-4.2, 1.6)   | 0.4 (-2.4, 3.1)  | -0.2 (-2.8, 2.4)   | -1.3 (-3.9, 1.4) | -1.0 (-3.7, 1.7) |
| PFUnDA                 | 0.5 (-1.0, 1.9)  | -1.6 (-3.0, -0.2)* | -0.5 (-1.9, 0.9) | -0.5 (-1.8, 0.8)   | -0.5 (-1.8, 0.9) | -0.3 (-1.7, 1.0) |
| PFDoDA                 | 0.2 (-2.2, 2.6)  | -1.9 (-4.4, 0.5)   | -0.9 (-3.2, 1.5) | -2.0 (-4.0, 0.1)   | -1.4 (-3.6, 0.8) | -1.3 (-3.5, 0.9) |

Abbreviation: CI, confidence interval; FSIQ, full scale IQ; PFASs, perfluoroalkyl substances; PFDeA, perfluorodecanoic acid; PFDoDA, perfluorododecanoic acid; PFHxS, perfluorohexanesulfonic acid; PFNA, perfluorononanoic acid; PFOA, perfluorooctanoic acid; PFOS, perfluorooctane sulfonate; PFUnDA, perfluoroundecanoic acid; PIQ, performance IQ; VIQ, verbal IQ.

\*p<0.05.

Models were adjusted for maternal education, family annual income, children's age, sex and HOME score at IQ assessment.
